# Supplementary material for: Inverse opal hydrogels with adjustable band gaps tuned by polyethylene glycol
Source: Royal Society of Chemistry journal article supplement (doi:10.1039/c1jm13019f), 2011-01-01
Supplement: c1jm13019f.pdf [file c1jm13019f.pdf]

## Supporting information

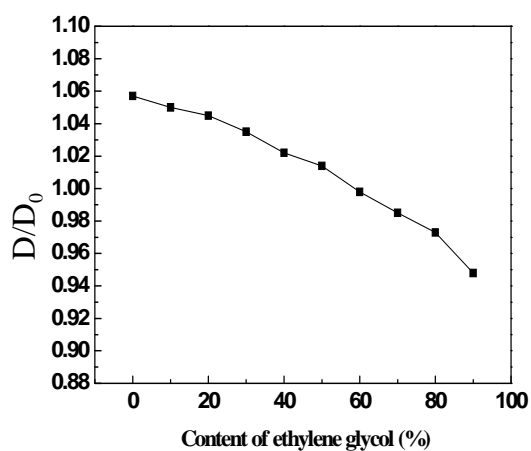

Fig. S1 Swelling ratio of IOH after being immersed and equilibrated in glycol solution

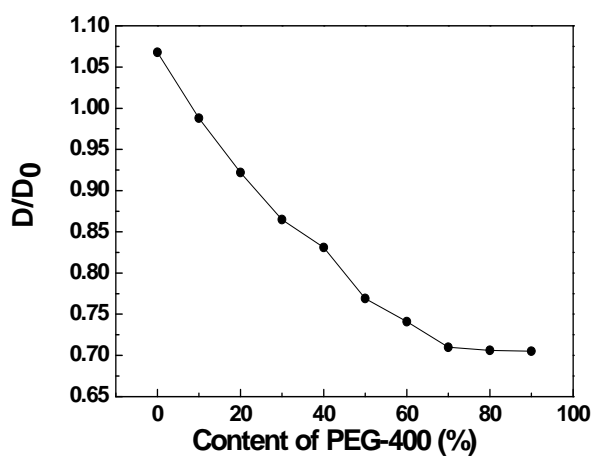

Fig. S2 Swelling ratio of IOH after being immersed in PEG-400 solution.

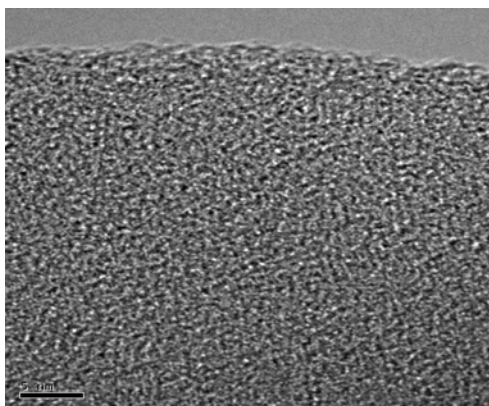

Fig. S3 TEM image of the mesopores left by PEG600 molecules
